# Supplementary material for: Surveillance of Landraces’ Seed Health in South Italy and New Evidence on Crop Diseases
Source: MDPI journal article supplement (doi:10.3390/plants12040812), 2023-02-11
Supplement: s1 [file s1]

Table S1. Results of mycological screening.

| Species                                           | Accession                               | Fungi                                                                                                                     |
|---------------------------------------------------|-----------------------------------------|---------------------------------------------------------------------------------------------------------------------------|
| <i>A. cepa</i>                                    | Agostina                                | 2% <i>Alternaria</i> spp.                                                                                                 |
|                                                   | di Alife (alifana)                      | Not detected                                                                                                              |
|                                                   | di Eremiti                              | 1% <i>Aspergillus niger</i>                                                                                               |
| <i>A. sativum</i>                                 | Bianco locale                           | Not detected                                                                                                              |
|                                                   | ecotipo locale di Caposele              | 1% <i>Fusarium proliferatum</i>                                                                                           |
| <i>Brassica oleracea</i><br>var. <i>italica</i>   | Broccolo del Vallo di Diano             | 17% <i>Penicillium</i> sp.<br>2% <i>Aspergillus</i> spp.                                                                  |
|                                                   | Broccolo dell'Olio                      | 2% <i>Alternaria</i> spp.<br>1% <i>Fusarium</i> spp.                                                                      |
|                                                   | Broccolo di Natale                      | Not detected                                                                                                              |
|                                                   | Broccolo San Pasquale                   | Not detected                                                                                                              |
| <i>Brassica oleracea</i><br>var. <i>sabellica</i> | Torzella riccia                         | 6% <i>Alternaria</i> spp. ( <i>Alternaria alternata</i> , <i>Alternaria infectoria</i> , <i>Alternaria brassicicola</i> ) |
| <i>Brassica rapa</i> var. <i>rapa</i>             | Catozza                                 | 100% <i>Alternaria</i> spp.                                                                                               |
| <i>L. sativus</i>                                 | Alta Irpinia                            | 3% <i>Penicillium</i>                                                                                                     |
|                                                   | di Calitri                              | Not detected                                                                                                              |
|                                                   | di Colliano                             | Not detected                                                                                                              |
|                                                   | di Montefalcone                         | 6% <i>Rhizopus</i>                                                                                                        |
| <i>L. cicera</i>                                  | Maracuocciolo/Maracuccia                | 3% <i>Alternaria</i> spp., 1% <i>Stemphylium globuliferum</i>                                                             |
| <i>Lens culinaris</i>                             | di Colliano                             | Detection of <i>Fusarium oxysporum</i> in symptomatic plants                                                              |
| <i>P. vulgaris</i>                                | Tondino di Castel di Sasso Acc. 2022    | 1 % <i>Macrophomina phaseolina</i><br>1% <i>Apiospora arundinis</i>                                                       |
| <i>P. sativum</i>                                 | Centogiorni 2021                        | 44% <i>Chaetomium</i> spp.<br>3% <i>Alternaria</i> spp.                                                                   |
|                                                   | Centogiorni Acc. 2021 (Pollenatrocchia) | 2% <i>Ascochyta pisi</i>                                                                                                  |
|                                                   | Centogiorni Acc. 2021 ex situ           | Not detected                                                                                                              |

| Species               | Accession                             | Fungi                                                                                      |
|-----------------------|---------------------------------------|--------------------------------------------------------------------------------------------|
|                       | Centogiorni Somma Vesuviana Acc. 2021 | <i>Not detected</i>                                                                        |
|                       | Santacroce                            | <i>Not detected</i>                                                                        |
|                       | Santacroce Acc. M 2021                | 2% <i>Ascochyta pisi</i><br>3% <i>Alternaria alternata</i>                                 |
|                       | Santacroce Acc. N 2021                | <i>Not detected</i>                                                                        |
|                       | Santacroce Acc. T 2021                | 2% <i>Cladosporium sp.</i> ; 1% <i>Penicillium sp.</i>                                     |
| <i>V. faba</i>        | A Corna                               | 3% <i>Ascochyta fabae</i>                                                                  |
|                       | A sciabola Acc. 2021                  | 1% <i>Chaetomium</i><br>1% <i>Stemphylium vesicarium</i><br>1% <i>Alternaria alternata</i> |
|                       | lunga di Somma Vesuviana              | <i>Not detected</i>                                                                        |
|                       | lunga Acc. 2020 nocerino-sarnese      | <i>Not detected</i>                                                                        |
|                       | lunga Acc. 2021 nocerino-sarnese      | 1% <i>Sclerotinia sclerotiorum</i><br>1% <i>Alternaria alternata</i>                       |
| <i>V. unguiculata</i> | Corna dei signori (San Marzano)       | 2% <i>Alternaria spp.</i>                                                                  |
|                       | Fagiolino lungo San Marzano           | <i>Not detected</i>                                                                        |
|                       | Corna dei Signori (Castel S. Giorgio) | 1% <i>Chaetomium</i>                                                                       |

Table S2. Overview of bacteriological and virological results

| Species                                        | Accession                   | Geographic area of cultivation  | Bacteria                                            | Viruses |
|------------------------------------------------|-----------------------------|---------------------------------|-----------------------------------------------------|---------|
| <i>A. sativum</i>                              | Bianco locale               | Avellinese                      | <i>Not detected</i>                                 | /       |
|                                                | ecotipo locale di Caposele  | Caposele (AV)                   |                                                     |         |
| <i>Brassica oleracea</i> var. <i>italica</i>   | Broccolo del Vallo di Diano | Vallo di Diano (NA)             | <i>Not detected</i>                                 | /       |
|                                                | Broccolo dell'Olio          | Agro nocerino-sarnese (Salerno) | <i>Not detected</i>                                 |         |
|                                                | Broccolo di Natale          | Agro acerrano-mariglianese (NA) | <i>Not detected</i>                                 |         |
|                                                | Broccolo San Pasquale       | Agro acerrano-mariglianese (NA) | <i>Not detected</i>                                 |         |
| <i>Brassica oleracea</i> var. <i>sabellica</i> | Torzella riccia             | Agro acerrano-mariglianese (NA) | <i>Xanthomonas campestris</i> pv. <i>campestris</i> |         |

| Species                               | Accession                           | Geographic area of cultivation                       | Bacteria                                                              | Viruses      |
|---------------------------------------|-------------------------------------|------------------------------------------------------|-----------------------------------------------------------------------|--------------|
| <i>Brassica rapa</i> var. <i>rapa</i> | Catozza                             | Casertano, napoletano and Agro nocerino-sarnese (SA) | Not detected                                                          | /            |
| <i>L. sativus</i>                     | Alta Irpinia                        | Avellinese                                           | Not detected                                                          | /            |
|                                       | di Calitri                          | Calitri (AV)                                         | Not detected                                                          |              |
|                                       | di Colliano                         | Colliano (SA)                                        | Not detected                                                          |              |
|                                       | di Montefalcone                     | Montefalcone (BN)                                    | Not detected                                                          |              |
| <i>Phaseolus vulgaris</i>             | Bianco di Villa Santa Croce         | Villa di Santa Croce (CE)                            | Not detected                                                          | Not detected |
|                                       | Butirro Acc. 2021                   | Vico Equense (NA)                                    | Not detected                                                          | BCMV         |
|                                       | Butirro Acc. 2020                   | Vico Equense (NA)                                    | Not detected                                                          | Not detected |
|                                       | Cannellino Sessantino dei 30 anni   | Acerra (NA)                                          | Not detected                                                          | Not detected |
|                                       | Cannellino Bianco di Calitri        | Calitri (AV)                                         | Not detected                                                          | CMV          |
|                                       | dei 7 anni                          | Visciano (NA)                                        | Not detected                                                          | Not detected |
|                                       | dei Signori                         | Agro nocerino-sarnese (SA)                           | <i>Xanthomonas axonopodis</i> pv. <i>phaseoli</i> /var <i>fuscans</i> | Not detected |
|                                       | della Regina                        | Valle dell'Angelo (SA)                               | Not detected                                                          | BCMV         |
|                                       | della Regina acc. 2 2021 Bianco     | Montano Antilia (SA)                                 | Not detected                                                          | Not detected |
|                                       | della Regina acc. 2 2021 Gandolfi   | Montano Antilia (SA)                                 | Not detected                                                          | BCMV         |
|                                       | della Regina Acc. 2 2021 Mazzamauro | Montano Antilia (SA)                                 | Not detected                                                          | BCMV         |
|                                       | della Regina Acc.2                  | San Lupo (BN)                                        | Not detected                                                          | BCMV         |
|                                       | Della Regina di Gorga               | Gorga (SA)                                           | Not detected                                                          | Not detected |
|                                       | della Regina                        | Montano Antilia (SA)                                 | Not detected                                                          | Not detected |
|                                       | Dente di Morto Acc. 2021            | Agro acerrano-mariglianese (NA)                      | <i>Xanthomonas axonopodis</i> pv. <i>phaseoli</i> /var <i>fuscans</i> | CMV          |
|                                       | Dente di Morto Acc.1                | Agro acerrano-mariglianese (NA)                      | <i>Xanthomonas axonopodis</i> pv. <i>phaseoli</i> /var <i>fuscans</i> | Not detected |
|                                       | Dente di Morto Acc.2                | Agro acerrano-mariglianese (NA)                      | <i>Xanthomonas axonopodis</i> pv. <i>phaseoli</i> /var <i>fuscans</i> | CMV          |
|                                       | Dente di Morto Acc.3                | Agro acerrano-mariglianese (NA)                      | <i>Xanthomonas axonopodis</i> pv. <i>phaseoli</i> /var <i>fuscans</i> | Not detected |

| Species           | Accession                             | Geographic area of cultivation       | Bacteria                                                              | Viruses      |
|-------------------|---------------------------------------|--------------------------------------|-----------------------------------------------------------------------|--------------|
|                   | Dente di Morto Acc.4                  | Agro acerrano-mariglianese (NA)      | <i>Xanthomonas axonopodis</i> pv. <i>phaseoli</i> /var <i>fuscans</i> | Not detected |
|                   | Dente di Morto Acc.5                  | Agro acerrano-mariglianese (NA)      | <i>Xanthomonas axonopodis</i> pv. <i>phaseoli</i> /var <i>fuscans</i> | CMV          |
|                   | Dente di Morto Acc.6                  | Agro acerrano-mariglianese (NA)      | <i>Xanthomonas axonopodis</i> pv. <i>phaseoli</i> /var <i>fuscans</i> | CMV          |
|                   | Dente di Morto Acc.7                  | Agro acerrano-mariglianese (NA)      | <i>Xanthomonas axonopodis</i> pv. <i>phaseoli</i> /var <i>fuscans</i> | CMV          |
|                   | Dente di Morto Acc. 2020              | Agro acerrano-mariglianese (NA)      | Not detected                                                          | BCMV         |
|                   | di Prata Melizzano                    | Prata Sannita - Melizzano (BN)       | Not detected                                                          | CMV-BCMV     |
|                   | di Volturara Irpina                   | Volturara Irpina (NA)                | Not detected                                                          | Not detected |
|                   | Fasulo a tubbettiello                 | Ruviano (CE)                         | Not detected                                                          | Not detected |
|                   | Giallo del Fortore                    | Alto Fortore (BN)                    | Not detected                                                          | Not detected |
|                   | Lardari                               | Agerola (NA)                         | Not detected                                                          | CMV          |
|                   | Regina                                | Grottaminarda (AV)                   | Not detected                                                          | Not detected |
|                   | Rosso di Acerra                       | Acerra (NA)                          | Not detected                                                          | CMV-BCMV     |
|                   | Schiacciatello                        | Cellole (SA)                         | Not detected                                                          | Not detected |
|                   | Tabaccanti                            | Vallo di Diano (NA)                  | Not detected                                                          | BCMV         |
|                   | Tondino Bianco di Calitri             | Calitri (AV)                         | Not detected                                                          | Not detected |
|                   | Tondino di Castel di Sasso Acc. 2022  | Castel di Sasso (CE)                 | Not detected                                                          | Not detected |
|                   | Tondino di Villaricca                 | Villaricca (NA)                      | Not detected                                                          | Not detected |
|                   | Tondino di Villaricca                 | Villaricca (NA)                      | Not detected                                                          | Not detected |
|                   | Tondo Bianco                          | Sarno (SA)                           | Not detected                                                          | Not detected |
| <i>P. sativum</i> | Centogiorni 2021                      | Vesuvio / Agro nocerino-sarnese (NA) | Not detected                                                          | Not detected |
|                   | Centogiorni Acc. 2021                 | Acerra (NA)                          | Not detected                                                          | Not detected |
|                   | Centogiorni Acc. 2021                 | Pollenatrocchia (NA)                 | Not detected                                                          | Not detected |
|                   | Centogiorni Somma Vesuviana Acc. 2021 | Somma Vesuviana (NA)                 | Not detected                                                          | Not detected |

| Species                  | Accession                       | Geographic area of cultivation  | Bacteria            | Viruses             |
|--------------------------|---------------------------------|---------------------------------|---------------------|---------------------|
|                          | Santacroce                      | Flegrea Area (NA)               | <i>Not detected</i> | <i>Not detected</i> |
|                          | Santacroce Acc. M 2021          | Flegrea Area (NA)               | <i>Not detected</i> | <i>Not detected</i> |
|                          | Santacroce Acc. N 2021          | Flegrea Area (NA)               | <i>Not detected</i> | <i>Not detected</i> |
|                          | Santacroce Acc. T 2021          | Napoletano                      | <i>Not detected</i> | <i>Not detected</i> |
| <i>V. faba</i>           | A sciabola Acc. 2021            | Agro acerrano-mariglianese (NA) | <i>Not detected</i> | <i>Not detected</i> |
|                          | A Corna                         | Agronoceronomariglianese        | <i>Not detected</i> | <i>Not detected</i> |
|                          | lunga                           | Somma Vesuviana (NA)            | <i>Not detected</i> | <i>Not detected</i> |
|                          | lunga Acc. 2020                 | Nocerino-sarnese (NA)           | <i>Not detected</i> | <i>Not detected</i> |
|                          | lunga Acc. 2021                 | Nocerino-sarnese (NA)           | <i>Not detected</i> | <i>Not detected</i> |
| <i>Vigna unguiculata</i> | Corna dei signori (San Marzano) | San Marzano sul Sarno (SA)      | <i>Not detected</i> | BCMV                |
|                          | Fagiolino lungo San Marzano     | San Marzano sul Sarno (SA)      | <i>Not detected</i> | BCMV                |
|                          | Corna dei Signori               | Castel S. Giorgio (SA)          | <i>Not detected</i> | BCMV                |

Legend: / = not tested
